# Supplementary material for: Dietary Alteration of the Gut Microbiome and Its Impact on Weight and Fat Mass: A Systematic Review and Meta-Analysis
Source: MDPI journal article supplement (doi:10.3390/genes9030167), 2018-03-16
Supplement: s1 [file s1]

| Last Author | Journal                              | Year | Type of dietary agent | Agent                                                                                                                                                                                                                                                                                                                                                                                                                                        | Duration | Placebo                                     |
|-------------|--------------------------------------|------|-----------------------|----------------------------------------------------------------------------------------------------------------------------------------------------------------------------------------------------------------------------------------------------------------------------------------------------------------------------------------------------------------------------------------------------------------------------------------------|----------|---------------------------------------------|
| Asemi       | Annals of Nutrition and Metabolism   | 2013 | Probiotic             | Multispecies probiotic supplement consisted of 7 viable and freeze-dried strains:<br>Lactobacillus acidophilus ( $2 \times 10^9$ CFU), L. casei ( $7 \times 10^9$ CFU), L. rhamnosus ( $1.5 \times 10^9$ CFU), L. bulgaricus ( $2 \times 10^8$ CFU), Bifidobacterium breve ( $2 \times 10^{10}$ CFU), B. longum ( $7 \times 10^9$ CFU), Streptococcus thermophilus ( $1.5 \times 10^9$ CFU), and 100 mg fructo-oligosaccharide with lactose. | 8 weeks  | 100 mg fructo-oligosaccharide with lactose. |
| Canfora     | Gastroenterology                     | 2017 | Prebiotic             | Galacto-oligosaccharide 15g                                                                                                                                                                                                                                                                                                                                                                                                                  | 12 weeks | Maltodextrin 16.95g                         |
| Fernandes   | Journal of Clinical Gastroenterology | 2016 | Prebiotic             | Fructo-oligosaccharide 6g                                                                                                                                                                                                                                                                                                                                                                                                                    | 15 days  | Maltodextrin 6g                             |
| Fernandes   | Journal of Clinical Gastroenterology | 2016 | Synbiotic             | 6 g of FOS+ $1 \times 10^9$ Lactobacillus paracasei LPC-37, $1 \times 10^9$ Lactobacillus rhamnosus HN001, $1 \times 10^9$ Lactobacillus acidophilus NCFM, and $1 \times 10^9$ Bifidobacterium lactis HN019                                                                                                                                                                                                                                  | 15 days  | Maltodextrin 6g                             |

|             |                                                     |      |           |                                                                                                                                                                                                                                                                                                                                                                                                                                                                     |          |                                                                                                        |
|-------------|-----------------------------------------------------|------|-----------|---------------------------------------------------------------------------------------------------------------------------------------------------------------------------------------------------------------------------------------------------------------------------------------------------------------------------------------------------------------------------------------------------------------------------------------------------------------------|----------|--------------------------------------------------------------------------------------------------------|
| Gomes       | Obesity                                             | 2016 | Probiotic | Maltodextrin (48.3%), modified starch (24.21%), xylitol (24.21%), silicium dioxide (0.97%), and $1 \times 10^9$ CFU of each of the probiotic strains: <i>Lactobacillus acidophilus</i> LA-14, <i>Lactobacillus casei</i> LC-11, <i>Lactococcus lactis</i> LL-23, <i>Bifidobacterium bifidum</i> BB-06, and <i>Bifidobacterium lactis</i> BL-4 (DaniscoVR). The women consumed four sachets daily before breakfast for 8 weeks, totaling $2 \times 10^{10}$ CFU/day. | 8 weeks  | Unspecified                                                                                            |
| Higashikawa | European Journal of Clinical Nutrition              | 2016 | Probiotic | Living <i>Pediococcus pentosaceus</i> LP28 powder with dextrin, $10^{11}$                                                                                                                                                                                                                                                                                                                                                                                           | 12 weeks | Dextrin only                                                                                           |
| Higashikawa | European Journal of Clinical Nutrition              | 2016 | Probiotic | Heat-killed <i>Pediococcus pentosaceus</i> LP28 powder with dextrin, $10^{11}$                                                                                                                                                                                                                                                                                                                                                                                      | 12 weeks | Dextrin only                                                                                           |
| Javadi      | Crescent Journal of Medical and Biological Sciences | 2017 | Probiotic | <i>Bifidobacterium longum</i> and <i>Lactobacillus acidophilus</i> : $2 \times 10^7$ CFU/d                                                                                                                                                                                                                                                                                                                                                                          | 3 months | Maltodextrin                                                                                           |
| Javadi      | Crescent Journal of Medical and Biological Sciences | 2017 | Prebiotic | Inulin                                                                                                                                                                                                                                                                                                                                                                                                                                                              | 3 months | Fat and lactose-free milk                                                                              |
| Javadi      | Crescent Journal of Medical and Biological Sciences | 2017 | Synbiotic | <i>Bifidobacterium longum</i> and <i>Lactobacillus acidophilus</i> : $2 \times 10^7$ CFU/d + Inulin                                                                                                                                                                                                                                                                                                                                                                 | 3 months | Maltodextrin + Fat and lactose-free milk                                                               |
| Jung        | Journal of Functional Foods                         | 2015 | Probiotic | 2 g of powder of two probiotic strains, <i>L. curvatus</i> HY7601 and <i>L. plantarum</i> KY1032, each at $2.5 \times 10^9$ cfu, twice a day                                                                                                                                                                                                                                                                                                                        | 12 weeks | 2g powder (1.34 g of crystalline cellulose, 0.6 g of lactose, and 0.06 g of blueberry-flavoring agent) |
| Jung        | Korean Journal of Family Medicine                   | 2013 | Probiotic | BNR17 capsules were composed of $10^{10}$ cfu of <i>Lb. gasseri</i> BNR17 and filler powder (50% trehalose, 25% skim milk, and 25% fructo-oligosaccharide) - 6 capsules/day                                                                                                                                                                                                                                                                                         | 12 weeks | Filler alone                                                                                           |

|         |                                        |      |           |                                                                                                                                                                                                                                                                                   |          |                                                                                                                                                                                                                     |
|---------|----------------------------------------|------|-----------|-----------------------------------------------------------------------------------------------------------------------------------------------------------------------------------------------------------------------------------------------------------------------------------|----------|---------------------------------------------------------------------------------------------------------------------------------------------------------------------------------------------------------------------|
| Kadooka | European Journal of Clinical Nutrition | 2010 | Probiotic | Lactobacillus gasseri SBT2055 $5 \times 10^{10}$ cfu/100 g + 11% skim milk powder and a small amount of flavoring, agar and sucralose as a zero-calorie artificial sweetener                                                                                                      | 12 weeks | 11% skim milk powder and a small amount of flavoring, agar and sucralose as a zero-calorie artificial sweetener                                                                                                     |
| Kadooka | European Journal of Clinical Nutrition | 2010 | Probiotic | Lactobacillus gasseri SBT2055 $5 \times 10^{10}$ cfu/100 g + 11% skim milk powder and a small amount of flavoring, agar and sucralose as a zero-calorie artificial sweetener                                                                                                      | 8 weeks  | 11% skim milk powder and a small amount of flavoring, agar and sucralose as a zero-calorie artificial sweetener                                                                                                     |
| Kadooka | European Journal of Clinical Nutrition | 2010 | Probiotic | Lactobacillus gasseri SBT2055 $5 \times 10^{10}$ cfu/100 g + 11% skim milk powder and a small amount of flavoring, agar and sucralose as a zero-calorie artificial sweetener                                                                                                      | 4 weeks  | 11% skim milk powder and a small amount of flavoring, agar and sucralose as a zero-calorie artificial sweetener                                                                                                     |
| Kadooka | British Journal of Nutrition           | 2013 | Probiotic | 11% skimmed milk powder and a small amount of flavoring, agar and sucralose as a zero-energy artificial sweetener plus starter cultures of Streptococcus thermophilus and Lactobacillus delbrueckii ssp. Bulgaricus plus Lactobacillus gasseri SBT2055 $7.9 (SD 1.1) \times 10^7$ | 12 weeks | 11% skimmed milk powder and a small amount of flavoring, agar and sucralose as a zero-energy artificial sweetener plus starter cultures of Streptococcus thermophilus and Lactobacillus delbrueckii ssp. Bulgaricus |
| Kadooka | British Journal of Nutrition           | 2013 | Probiotic | 11% skimmed milk powder and a small amount of flavoring, agar and sucralose as a zero-energy artificial sweetener plus starter cultures of Streptococcus thermophilus and Lactobacillus delbrueckii ssp. Bulgaricus plus Lactobacillus gasseri SBT2055 $6.9 (SD 3.5) \times 10^6$ | 12 weeks | 11% skimmed milk powder and a small amount of flavoring, agar and sucralose as a zero-energy artificial sweetener plus starter cultures of Streptococcus thermophilus and Lactobacillus delbrueckii ssp. Bulgaricus |

|         |                                        |      |           |                                                                                                                                                                                                                                                                                                                                                                                        |          |                                                                                                                      |
|---------|----------------------------------------|------|-----------|----------------------------------------------------------------------------------------------------------------------------------------------------------------------------------------------------------------------------------------------------------------------------------------------------------------------------------------------------------------------------------------|----------|----------------------------------------------------------------------------------------------------------------------|
| Kim     | Food and Function                      | 2017 | Probiotic | 2 g of probiotic powder twice a day containing <i>L. curvatus</i> HY7601 ( $2.5 \times 10^9$ colony forming units (cfu)) and <i>L. plantarum</i> KY1032 ( $2.5 \times 10^9$ cfu)                                                                                                                                                                                                       | 12 weeks | Powder without probiotic agents                                                                                      |
| Lambert | Clinical Nutrition                     | 2017 | Prebiotic | 5 g/serving of yellow pea fiber ('Best' Pea Fiber, Best Cooking Pulses Inc., Portage la Prairie, MB, Canada)                                                                                                                                                                                                                                                                           | 12 weeks | isocaloric dose of control wafers with no pea fiber (204 kcal of total additional energy per day in each group).     |
| Leber   | European Journal of Clinical Nutrition | 2012 | Probiotic | Three bottles containing 65ml of YAKULT light (containing <i>L. casei</i> Shirota at a concentration of $10^8$ /ml, Yakult Austria, Vienna) per day for 3 months (probiotic)                                                                                                                                                                                                           | 3 months | None, no treatment                                                                                                   |
| Madjd   | American Journal of Clinical Nutrition | 2016 | Probiotic | PY was a commercially available product prepared with the starter cultures of <i>Streptococcus thermophiles</i> and <i>Lactobacillus bulgaricus</i> , enriched with the probiotic culture of 2 strains of lactobacilli ( <i>Lactobacillus acidophilus</i> LA5) and bifidobacterial ( <i>Bifidobacterium lactis</i> BB12) with a total minimum of $1 \times 10^7$ colony-forming units. | 12 weeks | nonprobiotic conventional yogurt contained the starter cultures of <i>S. thermophiles</i> and <i>L. bulgaricus</i> . |
| Minami  | Journal of Nutritional Science         | 2015 | Probiotic | Lyophilized powder of <i>B. breve</i> B-3, a strain originating from a healthy infant, and had mainly maize starch as the carrier in an acid-protective gelatin capsule ( $5 \times 10^{10}$ colony-forming units per three capsules)                                                                                                                                                  | 12 weeks | internal matrix (mainly maize starch).                                                                               |

|        |                                                 |      |           |                                                                                                                                                                                                                                                                                                                                                                                                                       |          |                                        |
|--------|-------------------------------------------------|------|-----------|-----------------------------------------------------------------------------------------------------------------------------------------------------------------------------------------------------------------------------------------------------------------------------------------------------------------------------------------------------------------------------------------------------------------------|----------|----------------------------------------|
| Minami | Journal of Nutritional Science                  | 2015 | Probiotic | Lyophilized powder of B. breve B-3, a strain originating from a healthy infant, and had mainly maize starch as the carrier in an acid-protective gelatin capsule ( $5 \times 10^{10}$ colony-forming units per three capsules)                                                                                                                                                                                        | 8 weeks  | internal matrix (mainly maize starch). |
| Minami | Journal of Nutritional Science                  | 2015 | Probiotic | Lyophilized powder of B. breve B-3, a strain originating from a healthy infant, and had mainly maize starch as the carrier in an acid-protective gelatin capsule ( $5 \times 10^{10}$ colony-forming units per three capsules)                                                                                                                                                                                        | 4 weeks  | internal matrix (mainly maize starch). |
| Rabiei | Medical Journal of the Islamic Republic of Iran | 2015 | Synbiotic | Each symbiotic capsule was consisted of Lactobacillus casei, Lactobacillus rhamnosus, Streptococcus thermophilus, Bifidobacterium breve, Lactobacillus acidophilus, Bifidobacterium longum, Lactobacillus bulgaricus, FOS (Fructo-oligosaccharide - Prebiotic), Magnesium stearate (source: mineral and vegetable), Vegetable capsule (hydroxypropyl methyl cellulose) TVC: 200 million CFU TVC: $2 \times 10^8$ CFU. | 12 weeks | Maltodextrin                           |

|              |                                                 |      |           |                                                                                                                                                                                                                                                                                                                                                                                                                      |          |                                                      |
|--------------|-------------------------------------------------|------|-----------|----------------------------------------------------------------------------------------------------------------------------------------------------------------------------------------------------------------------------------------------------------------------------------------------------------------------------------------------------------------------------------------------------------------------|----------|------------------------------------------------------|
| Rabiei       | Medical Journal of the Islamic Republic of Iran | 2015 | Synbiotic | Each symbiotic capsule was consisted of Lactobacillus casei, Lactobacillus rhamnosus, Streptococcus thermophilus, Bifidobacterium breve, Lactobacillus acidophilus, Bifidobacterium longum, Lactobacillus bulgaricus, FOS (Fructooligosaccharide - Prebiotic), Magnesium stearate (source: mineral and vegetable), Vegetable capsule (hydroxypropyl methyl cellulose) TVC: 200 million CFU TVC: $2 \times 10^8$ CFU. | 6 weeks  | Maltodextrin                                         |
| Reimer       | Molecular Research and Food Research            | 2017 | Prebiotic | Prebiotic bar (inulin-type fructans (ITF) with 6 g oligofructose + 2 g inulin from chicory root);                                                                                                                                                                                                                                                                                                                    | 12 weeks | Control bar                                          |
| Sanchez      | British Journal of Nutrition                    | 2013 | Probiotic | 10 mg of a Lactobacillus rhamnosus CGMCC1.3724 powder providing $1.62 \times 10^8$ cfu, 300 mg of a mix of oligofructose and inulin (70:30, v/v) and 3mg of magnesium stearate, 2 capsules                                                                                                                                                                                                                           | 12 weeks | 250 mg of maltodextrin and 3mg of magnesium stearate |
| Sharafedinov | Nutrition Journal                               | 2013 | Probiotic | L. plantarum TENSIA was added to the cheese milk in amounts of $1.5 \times 10^{11}$ CFU/g before renneting.                                                                                                                                                                                                                                                                                                          | 3 weeks  | Control cheese                                       |
| Stenman      | EBioMedicine                                    | 2016 | Probiotic | Bifidobacterium animalis ssp. lactis 420, $10^{10}$ CFU/day in 12 g of microcrystalline cellulose (B420)                                                                                                                                                                                                                                                                                                             | 6 months | Placebo, microcrystalline cellulose 12 g/day;        |
| Stenman      | EBioMedicine                                    | 2016 | Prebiotic | Litesse® Ultra polydextrose (LU) 12 g/day                                                                                                                                                                                                                                                                                                                                                                            | 6 months | Placebo, microcrystalline cellulose 12 g/day;        |
| Stenman      | EBioMedicine                                    | 2016 | Synbiotic | Bifidobacterium animalis ssp. lactis 420, $10^{10}$ CFU/day in 12 g of LU (LU + B420).                                                                                                                                                                                                                                                                                                                               | 6 months | Placebo, microcrystalline cellulose 12 g/day;        |

|         |                                              |      |           |                                                                                                                                                                                                                                                                                                                                                                                                                                                   |         |                                                                                                        |
|---------|----------------------------------------------|------|-----------|---------------------------------------------------------------------------------------------------------------------------------------------------------------------------------------------------------------------------------------------------------------------------------------------------------------------------------------------------------------------------------------------------------------------------------------------------|---------|--------------------------------------------------------------------------------------------------------|
| Zarrati | Journal of the American College of Nutrition | 2014 | Probiotic | Probiotic yogurt was prepared with the starter cultures containing <i>Streptococcus thermophilus</i> and <i>Lactobacillus bulgaricus</i> and was enriched with the lactobacilli and bifidobacterial based probiotic cultures ( <i>Lactobacillus acidophilus</i> LA5, <i>Lactobacillus casei</i> DN001, <i>Bifidobacterium lactis</i> BB12). The concentration of each probiotic strain in our yogurt was $1 \times 10^7$ colony-forming units/mL. | 8 weeks | Conventional yogurt contained only starter cultures of <i>S. thermophilus</i> and <i>L. bulgaricus</i> |
|---------|----------------------------------------------|------|-----------|---------------------------------------------------------------------------------------------------------------------------------------------------------------------------------------------------------------------------------------------------------------------------------------------------------------------------------------------------------------------------------------------------------------------------------------------------|---------|--------------------------------------------------------------------------------------------------------|
