# Supplementary material for: Dietary Alteration of the Gut Microbiome and Its Impact on Weight and Fat Mass: A Systematic Review and Meta-Analysis
Source: MDPI journal article supplement (doi:10.3390/genes9030167), 2018-03-16
Supplement: s1 [file s1]

| Last Author  | Year | Treatment | Control | Baseline |         | Post intervention |         | Baseline |         | Post intervention |         | Change in |             | Change in |        | Difference in weight |                                        | Control group correlation              | Treatment group correlation |
|--------------|------|-----------|---------|----------|---------|-------------------|---------|----------|---------|-------------------|---------|-----------|-------------|-----------|--------|----------------------|----------------------------------------|----------------------------------------|-----------------------------|
|              |      | group     | group   | weight   | SD      | weight            | SD      | weight   | SD      | weight            | SD      | weight    | SD          | weight    | SD     | change(trt-control)  | r between baseline and followup weight | r between baseline and followup weight |                             |
| Asemi        | 2013 | 27        | 27      | 73.03    | 13.3    | 72.4              | 11.42   | 73.48    | 13.37   | 73.48             | 13.37   | -0.63     | 2.337871129 | 0         | 1.9448 | 0.63                 | 0.993642464                            | 0.989420859                            |                             |
| Canfora      | 2017 | 21        | 23      | 96.9     | 11.5    | 98.2              | 11      | 98.4     | 11.9    | 99.5              | 12.3    | 1.3       | 1.363252214 | 1.1       | 1.8047 | -0.2                 | 0.993642464                            | 0.989420859                            |                             |
| Fernandes    | 2016 | 3         | 3       | 103      | 8.7     | 101.7             | 8.7     | 109.5    | 19.3    | 107.4             | 18.8    | -1.3      | 0.4         | -2        | 0.6    | -0.7                 | 0.998943057                            | 0.999848418                            |                             |
| Fernandes    | 2016 | 3         | 3       | 103      | 8.7     | 101.7             | 8.7     | 114.1    | 19.9    | 113.9             | 19.8    | -1.3      | 0.4         | -0.4      | 0.1    | 0.9                  | 0.998943057                            | 1                                      |                             |
| Gomes        | 2016 | 21        | 22      | 83.55    | 13.44   | 82.59             | 13      | 76.58    | 9.94    | 75.6              | 10.24   | -0.95     | 1.769864152 | -0.98     | 1.7765 | -0.03                | 0.991589918                            | 0.984939351                            |                             |
| Javadi       | 2017 | 20        | 19      | 86       | 11.98   | 86.51             | 12.05   | 86.92    | 12.37   | 85.08             | 12.25   | 0.51      | 1.163000542 | -1.84     | 2.1189 | -2.35                | 0.995332226                            | 0.985232424                            |                             |
| Javadi       | 2017 | 19        | 19      | 86       | 11.98   | 86.51             | 12.05   | 88.45    | 10.36   | 86.45             | 10.54   | 0.51      | 1.163000542 | -2        | 1.5306 | -2.51                | 0.995332226                            | 0.989420859                            |                             |
| Javadi       | 2017 | 17        | 19      | 86       | 11.98   | 86.51             | 12.05   | 89.88    | 11.92   | 87.91             | 12.08   | 0.51      | 1.163000542 | -1.97     | 1.7528 | -2.48                | 0.995332226                            | 0.989420859                            |                             |
| Jung         | 2013 | 25        | 29      | 77.4     | 11      | 77.2              | 11.6    | 77.2     | 11      | 76.1              | 10      | 0.2       | 2.4         | -1.1      | 2.2    | -1.3                 | 0.978840125                            | 0.982545455                            |                             |
| Jung         | 2015 | 49        | 46      | 73.5     | 9.63091 | 73.9              | 10.1057 | 73.5     | 8.96    | 72.9              | 9.1     | 0.42      | 1.424289296 | -0.65     | 1.61   | -1.07                | 0.990736364                            | 0.98422476                             |                             |
| Kadooka      | 2010 | 43        | 44      | 77.1     | 10.3609 | 77.4              | 10.6898 | 76.9     | 9.91049 | 75.8              | 9.74803 | 0.3       | 1.151210559 | -1.1      | 1.2997 | -1.4                 | 0.994505495                            | 0.991393443                            |                             |
| Kim          | 2017 | 32        | 34      | 73.2     | 10.0292 | 73.6              | 10.6123 | 71.9     | 8.0893  | 71.3              | 8.48528 | 0.46      | 1.399428455 | -0.6      | 1.6971 | -1.06                | 0.992397138                            | 0.98016317                             |                             |
| Lambert      | 2017 | 22        | 22      | 93.7     | 20.6378 | 94.1              | 20.1688 | 92.3     | 19.2307 | 91.5              | 18.7617 | 0.46      | 2.347875963 | -0.6      | 2.8025 | -1.06                | 0.993642464                            | 0.989420859                            |                             |
| Leber        | 2012 | 13        | 15      | 90.9     | 14.3    | 90.8              | 15.1    | 108.3    | 15.9    | 107.8             | 16.6    | -0.13     | 1.68        | -0.58     | 2.54   | -0.45                | 0.99494651                             | 0.988706524                            |                             |
| Madjd        | 2016 | 44        | 45      | 82.45    | 11.01   | 77.42             | 10.94   | 82.69    | 9.87    | 77.39             | 9.68    | -5.03     | 1.239525225 | -5.3      | 1.4344 | -0.27                | 0.993642464                            | 0.989420859                            |                             |
| Minami       | 2015 | 19        | 25      | 71.2     | 11.5    | 70.8              | 11.5    | 68.9     | 11.769  | 69.1              | 11.3331 | -0.4      | 1.296752969 | 0.2       | 1.7355 | 0.6                  | 0.993642464                            | 0.989420859                            |                             |
| Rabiei       | 2015 | 20        | 20      | 84       | 11.6    | 82.2              | 11.43   | 81.3     | 13.5    | 77.7              | 13.73   | -1.8      | 1.309490724 | -3.6      | 1.9937 | -1.8                 | 0.993642464                            | 0.989420859                            |                             |
| Reimer       | 2017 | 26        | 27      | 90.3     | 4.8     | 90.7              | 4.9     | 92.4     | 3.8     | 92.5              | 3.7     | 0.4       | 0.4         | 0.2       | 0.3    | -0.2                 | 0.996811224                            | 0.99715505                             |                             |
| Sanchez      | 2013 | 52        | 53      | NA       | NA      | NA                | NA      | NA       | NA      | NA                | NA      | -3.4      | 2.9         | -4.2      | 3.2    | -0.8                 | NA                                     | NA                                     |                             |
| Sharafedinov | 2013 | 25        | 11      | 102.4    | 14.4    | 98                | 13.3    | 105.6    | 16.2    | 99.9              | 14.4    | -4.4      | 1.909238218 | -5.7      | 2.8593 | -1.3                 | 0.993642464                            | 0.989420859                            |                             |
| Zarrati      | 2014 | 25        | 25      | 87       | 22      | 82.13             | 21.5    | 90.63    | 14      | 86.4              | 14      | -4.87     | 2.502844186 | -4.23     | 2.0364 | 0.64                 | 0.993642464                            | 0.989420859                            |                             |

Calculated from SEM, 95%CI or p value

Imputed
