# Supplementary material for: Dietary Alteration of the Gut Microbiome and Its Impact on Weight and Fat Mass: A Systematic Review and Meta-Analysis
Source: MDPI journal article supplement (doi:10.3390/genes9030167), 2018-03-16
Supplement: s1 [file s1]

| Last Author   | Year | Treatment | Control | Baseline fat |         | Post intervention |         | Baseline fat   |         | Post intervention  |         | Change in fat |             | Change in fat  |        | Difference in fat mass<br>change(trt-control) | Control group correlation<br>r between baseline and<br>followup fat mass | Treatment group correlation<br>r between baseline and<br>followup fat mass |
|---------------|------|-----------|---------|--------------|---------|-------------------|---------|----------------|---------|--------------------|---------|---------------|-------------|----------------|--------|-----------------------------------------------|--------------------------------------------------------------------------|----------------------------------------------------------------------------|
|               |      | group     | group   | mass control | SD      | fat mass control  | SD      | mass treatment | SD      | fat mass treatment | SD      | mass control  | SD          | mass treatment | SD     |                                               |                                                                          |                                                                            |
| Canfora       | 2017 | 21        | 23      | 36           | 9       | 36.3              | 8.9     | 36.3           | 8.9     | 37.1               | 8.9     | 0.3           | 2.200602197 | 0.8            | 2.3125 | 0.5                                           | 0.969833645                                                              | 0.966244774                                                                |
| Gomes         | 2016 | 21        | 22      | 39.73        | 8.23    | 39.05             | 7.35    | 36.3           | 7.32    | 34.96              | 7.52    | -0.68         | 2.938232308 | -1.33          | 1.9381 | -0.65                                         | 0.935040964                                                              | 0.966244774                                                                |
| Higashikawa   | 2016 | 21        | 20      | 23.81        | 4.51686 | 24.21             | 4.96407 | 23.31          | 3.62023 | 23.01              | 3.98684 | 0.4           | 1.02859127  | -0.3           | 1.0082 | -0.7                                          | 0.980867006                                                              | 0.969445657                                                                |
| Higashikawa   | 2016 | 21        | 20      | 23.81        | 4.51686 | 24.21             | 4.96407 | 23.86          | 4.76588 | 23.09              | 4.53675 | 0.4           | 1.02859127  | -0.77          | 1.054  | -1.17                                         | 0.980867006                                                              | 0.975524476                                                                |
| Kadooka       | 2010 | 43        | 44      | 22.9         | 4.93376 | 23.2              | 4.60484 | 23.5           | 5.68635 | 22.7               | 5.19895 | 0.3           | 1.31566921  | -0.8           | 1.4622 | -1.1                                          | 0.964285714                                                              | 0.967857143                                                                |
| Kadooka       | 2013 | 69        | 70      | NA           | NA      | NA                | NA      | NA             | NA      | NA                 | NA      | 0.5           | 1.258169803 | -0.6           | 1.457  | -1.1                                          | NA                                                                       | NA                                                                         |
| Kadooka       | 2013 | 71        | 70      | NA           | NA      | NA                | NA      | NA             | NA      | NA                 | NA      | 0.5           | 1.258169803 | -0.5           | 1.0562 | -1                                            | NA                                                                       | NA                                                                         |
| Kim           | 2017 | 32        | 34      | 22.99        | 4.43152 | 23.24             | 4.54814 | 22.16          | 3.33754 | 21.44              | 3.50725 | 0.24          | 1.166190379 | -0.72          | 1.3011 | -0.96                                         | 0.96659919                                                               | 0.928922909                                                                |
| Lambert       | 2017 | 22        | 22      | 33.4         | 10.788  | 33.8              | 10.788  | 34.8           | 10.788  | 34                 | 10.3189 | 0.4           | 2.649815226 | -0.8           | 2.7812 | -1.2                                          | 0.969833645                                                              | 0.966244774                                                                |
| Minami        | 2015 | 19        | 25      | 23.5         | 5       | 23.4              | 5       | 21.5           | 4.3589  | 20.8               | 3.92301 | -0.1          | 1.228135879 | -0.7           | 1.1595 | -0.6                                          | 0.969833645                                                              | 0.966244774                                                                |
| Reimer        | 2017 | 26        | 27      | 27.9         | 2.2     | 28                | 2.1     | 29             | 2       | 29.3               | 1.9     | 0.1           | 0.3         | 0.2            | 0.3    | 0.1                                           | 0.991341991                                                              | 0.989473684                                                                |
| Sanchez       | 2013 | 52        | 53      | NA           | NA      | NA                | NA      | NA             | NA      | NA                 | NA      | -2.76         | 2.83        | -3.51          | 2.39   | -0.75                                         | NA                                                                       | NA                                                                         |
| Sharafedtinov | 2013 | 25        | 11      | 46.4         | 7.9     | 42.4              | 9.6     | 46.7           | 10.3    | 42.7               | 9.8     | -4            | 2.732330999 | -4             | 2.6579 | 0                                             | 0.969833645                                                              | 0.966244774                                                                |

Calculated from SEM, 95%CI or p value
Imputed
