# Supplementary material for: Dietary Alteration of the Gut Microbiome and Its Impact on Weight and Fat Mass: A Systematic Review and Meta-Analysis
Source: MDPI journal article supplement (doi:10.3390/genes9030167), 2018-03-16
Supplement: s1 [file s1]

| Last Author   | Year | Treatment |       | Control |         | Baseline BMI      |         | Post intervention |         | Baseline BMI           |         | Post intervention |             | Change in BMI |         | Change in BMI |             | Difference in BMI<br>change(trt-control) | Control group<br>correlation r<br>between baseline<br>and followup BMI | Treatment group<br>correlation r<br>between baseline<br>and followup BMI |
|---------------|------|-----------|-------|---------|---------|-------------------|---------|-------------------|---------|------------------------|---------|-------------------|-------------|---------------|---------|---------------|-------------|------------------------------------------|------------------------------------------------------------------------|--------------------------------------------------------------------------|
|               |      | group     | group | control | SD      | BMI control group | SD      | treatment         | SD      | BMI treatment<br>group | SD      | control           | SD          | treatment     | SD      |               |             |                                          |                                                                        |                                                                          |
|               |      |           |       |         |         |                   |         |                   |         |                        |         |                   |             |               |         |               |             |                                          |                                                                        |                                                                          |
| Asemi         | 2013 | 27        | 27    | 30.17   | 4.23    | 29.91             | 4.27    | 31.61             | 6.36    | 30.96                  | 6.39    | -0.26             | 0.995631565 | -0.65         | 1.76702 | -0.39         | 0.972603346 | 0.961596602                              |                                                                        |                                                                          |
| Canfora       | 2017 | 21        | 23    | 32.3    | 3.5     | 32.7              | 3.3     | 33.3              | 3.7     | 33.7                   | 3.7     | 0.4               | 0.820282092 | 0.4           | 1.02542 | 0             | 0.972603346 | 0.961596602                              |                                                                        |                                                                          |
| Fernandes     | 2016 | 3         | 3     | 38.2    | 1.4     | 37.7              | 1.4     | 40.2              | 4.5     | 39.5                   | 4.4     | -0.5              | 0.1         | -0.7          | 0.2     | -0.2          | 0.99744898  | 0.999242424                              |                                                                        |                                                                          |
| Fernandes     | 2016 | 3         | 3     | 38.2    | 1.4     | 37.7              | 1.4     | 41.6              | 5.2     | 41.5                   | 5.2     | -0.5              | 0.1         | -0.1          | 0.1     | 0.4           | 0.99744898  | 0.999815089                              |                                                                        |                                                                          |
| Gomes         | 2016 | 21        | 22    | 33.34   | 4.69    | 32.61             | 4.53    | 31.7              | 3.9     | 31.24                  | 3.96    | -0.72             | 1.090743869 | -0.45         | 0.72475 | 0.27          | 0.972603346 | 0.983111172                              |                                                                        |                                                                          |
| Higashikawa   | 2016 | 21        | 20    | 27.37   | 1.43108 | 27.77             | 1.78885 | 26.84             | 1.2373  | 26.91                  | 1.28312 | 0.4               | 0.670820393 | 0.07          | 0.54991 | -0.33         | 0.937109375 | 0.90542328                               |                                                                        |                                                                          |
| Higashikawa   | 2016 | 21        | 20    | 27.37   | 1.43108 | 27.77             | 1.78885 | 27.1              | 1.14564 | 27.04                  | 1.37477 | 0.4               | 0.670820393 | -0.06         | 0.45826 | -0.45         | 0.937109375 | 0.95                                     |                                                                        |                                                                          |
| Javadi        | 2017 | 20        | 19    | 30.38   | 2.88    | 30.56             | 2.88    | 29.91             | 3.88    | 29.26                  | 3.59    | 0.18              | 0.44230705  | -0.65         | 0.74854 | -0.83         | 0.98820677  | 0.982905925                              |                                                                        |                                                                          |
| Javadi        | 2017 | 19        | 19    | 30.38   | 2.88    | 30.56             | 2.88    | 30.96             | 4.39    | 30.38                  | 4.63    | 0.18              | 0.44230705  | -0.58         | 0.7909  | -0.76         | 0.98820677  | 0.986029552                              |                                                                        |                                                                          |
| Javadi        | 2017 | 17        | 19    | 30.38   | 2.88    | 30.56             | 2.88    | 32.3              | 4.78    | 31.47                  | 4.58    | 0.18              | 0.44230705  | -0.83         | 0.85235 | -1.01         | 0.98820677  | 0.984321074                              |                                                                        |                                                                          |
| Jung          | 2013 | 28        | 29    | 29.6    | 3.6     | 29.3              | 4       | 28.6              | 2.2     | 28.1                   | 1.9     | 0.3               | 1           | -0.5          | 0.9     | -0.8          | 0.970833333 | 0.913875598                              |                                                                        |                                                                          |
| Jung          | 2015 | 49        | 46    | 27      | 1.49211 | 27.1              | 1.49211 | 27                | 1.47    | 26.8                   | 1.61    | 0.14              | 0.474763099 | -0.24         | 0.63    | -0.38         | 0.949380165 | 0.920289855                              |                                                                        |                                                                          |
| Kadooka       | 2010 | 43        | 44    | 27.2    | 1.64459 | 27.3              | 1.80905 | 27.5              | 1.62467 | 27.2                   | 1.62467 | 0.1               | 0.493375954 | -0.4          | 0.4874  | -0.5          | 0.963636364 | 0.955                                    |                                                                        |                                                                          |
| Kadooka       | 2013 | 69        | 70    | NA      | NA      | NA                | NA      | NA                | NA      | NA                     | NA      | 0.1               | 0.629084901 | -0.3          | 0.41627 | -0.4          | NA          | NA                                       |                                                                        |                                                                          |
| Kadooka       | 2013 | 71        | 70    | NA      | NA      | NA                | NA      | NA                | NA      | NA                     | NA      | 0.1               | 0.629084901 | -0.4          | 0.42248 | -0.5          | NA          | NA                                       |                                                                        |                                                                          |
| Kim           | 2017 | 32        | 34    | 27.1    | 1.57436 | 27.2              | 1.63267 | 26.6              | 1.30108 | 26.4                   | 1.41421 | 0.15              | 0.524785671 | -0.23         | 0.62225 | -0.38         | 0.947089947 | 0.89826087                               |                                                                        |                                                                          |
|               |      |           |       |         |         |                   |         |                   |         |                        |         |                   |             |               |         |               |             |                                          |                                                                        |                                                                          |
| Lambert       | 2017 | 22        | 22    | 33.3    | 6.09754 | 33.4              | 6.09754 | 33.1              | 6.09754 | 32.8                   | 6.09754 | 0.1               | 1.427310478 | -0.3          | 1.68987 | -0.4          | 0.972603346 | 0.961596602                              |                                                                        |                                                                          |
| Leber         | 2012 | 13        | 15    | 31.6    | 3.6     | 31.6              | 4       | 35.4              | 5.3     | 35.3                   | 5.5     | -0.05             | 0.6         | -0.18         | 0.78    | -0.13         | 0.993055556 | 0.990250429                              |                                                                        |                                                                          |
| Madjd         | 2016 | 44        | 45    | 32.05   | 3.94    | 30.08             | 3.86    | 32.14             | 3.2     | 30.08                  | 3.15    | -1.97             | 0.916361582 | -2.06         | 0.88131 | -0.09         | 0.972603346 | 0.961596602                              |                                                                        |                                                                          |
| Minami        | 2015 | 19        | 25    | 27.7    | 2.5     | 27.8              | 2.5     | 27.1              | 2.61534 | 27.2                   | 2.61534 | 0.1               | 0.585199262 | 0.1           | 0.72482 | 0             | 0.972603346 | 0.961596602                              |                                                                        |                                                                          |
| Rabiei        | 2015 | 20        | 20    | 32.7    | 5.39    | 32                | 5.23    | 32                | 4.08    | 30.6                   | 4.26    | -0.7              | 1.253078976 | -1.4          | 1.16934 | -0.7          | 0.972603346 | 0.961596602                              |                                                                        |                                                                          |
| Reimer        | 2017 | 26        | 27    | 31.3    | 6.23538 | 31.4              | 6.23538 | 31.9              | 4.58912 | 31.9                   | 4.58912 | 0.1               | 1.039230485 | 0.1           | 0.5099  | 0             | 0.986111111 | 0.99382716                               |                                                                        |                                                                          |
| Sharafedtinov | 2013 | 25        | 11    | 36.3    | 4.3     | 34.7              | 4.2     | 37.7              | 4.3     | 35.7                   | 3.8     | -1.6              | 0.99978355  | -2            | 1.22679 | -0.4          | 0.972603346 | 0.961596602                              |                                                                        |                                                                          |
| Zarrati       | 2014 | 25        | 25    | 33.9    | 3.365   | 32                | 3.265   | 33.8              | 3.175   | 32.25                  | 3.155   | -1.9              | 0.782303655 | -1.55         | 0.87737 | 0.35          | 0.972603346 | 0.961596602                              |                                                                        |                                                                          |

Calculated from SEM, 95%CI or p value

Imputed
